# Supplementary material for: Molecular Dissection of Pro-Fibrotic IL11 Signaling in Cardiac and Pulmonary Fibroblasts
Source: Front Mol Biosci. 2021 Sep 28;8:740650. doi: 10.3389/fmolb.2021.740650 (PMC8505966; doi:10.3389/fmolb.2021.740650)
Supplement: Supplementary file 3 [file DataSheet3.xlsx]

## Sheet: Figure 1
Figure 1. TGFβ1-/IL11-driven fibrogenesis is coincident with activation of ERK, unrelated to STAT3 phosphorylation and shows species-specific effects.
Fig. 1A	WB quantification		FC: Fold change
	BL	15 min	2 h	4 h	6 h	24 h
p-ERK/ERK (FC)	1	1.70448	1.93464	0.948504	1.82081	3.0742
p-STAT3/STAT3 (FC)	1	1.29836	1.3747	1.48192	4.54521	2.42903
Fig. 1C	WB quantification		FC: Fold change
		TGFb1 (15 min)					TGFb1 (24 h)
	BL	-	IgG	anti-IL11	anti-IL11RA	BL	-	IgG	anti-IL11	anti-IL11RA
p-ERK/ERK (FC)	1	1.70683	1.72136	1.66394	1.68664	1	3.11088	3.15019	1.32861	1.22963
p-STAT3/STAT3 (FC)	1	1.253	1.26303	1.21963	1.14773	1	3.13536	3.34654	3.07948	3.03568
aSMA/GAPDH (FC)	1	1.00019	1.12727	1.1458	1.11619	1	3.26958	3.1268	1.34758	1.14454
Fig. 1D	Collagen I (Intensity/Area)
BL	rhTGFb1	rhTGFb1+IgG	rhTGFb1+anti-IL11	rhTGFb1+anti-IL11RA
223.413	473.635	511.949	328.568	256.044
187.8	477.247	505.373	321.195	339.288
182.691	400.411	510.013	273.766	239.22
186.527	412.279	465.774	281.437	288.061
232.922	491	484.778	306.38	339.046
230.942	473.549	470.213	312.207	318.017
209.938	441.412	493.35	272.816	334.149
234.555	467.509	473.201	265.201	287.788
174.787	412.998	446.825	294.963	298.651
181.014	523.286	415.835	342.803	310.918
194.135	509.525	473.346	300.878	280.88
203.249	494.11	488.889	330.218	295.979
228.963	443.576	444.655	298.552	305.141
192.516	496.321	470.107	255.246	263.303
Fig. 1E	WB quantification		FC: Fold change
	BL	15 min	2 h	4 h	6 h	24 h
p-ERK/ERK (FC)	1	1.69152	2.00002	0.917657	1.31465	3.50721
p-STAT3/STAT3 (FC)	1	3.93114	2.59967	2.37318	2.26057	2.02158
Fig. 1F	WB quantification		FC: Fold change
		rhIL11 (10)		rhIL11 (1000)
	BL	15 min	24 h	15 min	24 h
p-ERK/ERK (FC)	1	1.71587	3.35759	1.73847	3.53663
p-STAT3/STAT3 (FC)	1	2.90607	1.7069	4.3853	1.9886
Fig. 1G	WB quantification		FC: Fold change
		rhIL11 (10)					rhIL11 (1000)
	BL	IgG	anti-IL11	anti-IL11RA	anti-gp130	anti-gp130+anti-IL11RA	IgG	anti-IL11	anti-IL11RA	anti-gp130	anti-gp130+anti-IL11RA
p-ERK/ERK (FC)	1	1.75245	1.00429	0.946958	0.910434	0.887911	1.77852	1.27579	1.24763	1.24114	0.984378
p-STAT3/STAT3 (FC)	1	3.05268	1.84462	3.02554	1.81534	1.46344	3.8334	1.89394	4.04208	1.71865	1.2056
Fig. 1H	WB quantification		FC: Fold change
		rhIL11 (10)					rhIL11 (1000)
	BL	IgG	anti-IL11	anti-IL11RA	anti-gp130	anti-gp130+anti-IL11RA	IgG	anti-IL11	anti-IL11RA	anti-gp130	anti-gp130+anti-IL11RA
p-ERK/ERK (FC)	1	3.25089	1.54046	1.4748	1.44757	1.65509	3.8259	2.02025	1.79038	1.77543	0.929024
aSMA/GAPDH (FC)	1	2.56284	1.02075	1.09091	1.38262	1.10011	2.75359	1.4413	1.36753	0.956225	0.975268
Fig. 1I	Collagen I (Intensity/Area)
BL	rhIL11	rhIL11+IgG	rhIL11+anti-IL11	rhIL11+anti-IL11RA	rhIL11+anti-gp130
450.621	635.237	618.372	374.657	412.306	418.113
412.327	545.521	599.014	352.258	469.283	347.648
486.381	566.25	572.046	426.803	377.769	362.829
406.97	499.12	546.376	365.461	378.899	438.097
424.142	482.969	595.86	362.329	361.58	408.538
452.064	554.829	476.984	315.703	360.94	380.441
400.151	586.588	535.126	368.134	341.229	390.315
497.844	560.475	531.937	417.903	378.531	424.175
427.435	463.838	600.573	347.687	343.059	408.494
411.475	468.737	570.265	333.599	370.879	403.31
449.331	459.898	567.314	371.905	362.587	357.826
436.377	520.188	549.151	446.719	407.361	409.168
441.856	501.468	464.212	357.479	330.946	385.803
452.944	567.356	558.125	374.721	372.948	377.454
Fig. 1K	WB quantification		FC: Fold change
		rmIL11 (15 min)			rmIL11 (24 h)			rhIL11 (15 min)			rhIL11 (24 h)
	BL	10	100	1000	10	100	1000	10	100	1000	10	100	1000
p-ERK/ERK (FC)	1	0.605395	0.957891	0.933579	2.82619	2.81388	2.70793	1.26741	0.976544	1.04173	1.31287	0.984428	0.928497
p-STAT3/STAT3 (FC)	1	1.81601	3.56459	4.57985	1.92403	1.72202	2.21522	1.24324	2.57505	4.80999	1.66812	1.34751	1.31951
Fig. 1L	WB quantification		FC: Fold change
	WT							Il11ra1-/-
	BL	rmIL11 (10)	rmIL11 (100)	rmIL11 (1000)	rhIL11 (10)	rhIL11 (100)	rhIL11 (1000)	BL	rmIL11 (10)	rmIL11 (100)	rmIL11 (1000)	rhIL11 (10)	rhIL11 (100)	rhIL11 (1000)
p-STAT3/STAT3 (FC)	1	1.63658	3.71874	4.64985	1.07044	2.20719	4.78439	1	0.911501	0.919677	0.896061	2.14948	3.75592	9.10921
Fig. 1M	WB quantification		FC: Fold change
	WT							Il11ra1-/-
	BL	rmIL11 (10)	rmIL11 (100)	rmIL11 (1000)	rhIL11 (10)	rhIL11 (100)	rhIL11 (1000)	BL	rmIL11 (10)	rmIL11 (100)	rmIL11 (1000)	rhIL11 (10)	rhIL11 (100)	rhIL11 (1000)
p-ERK/ERK (FC)	1	2.3717	2.37171	2.46684	1.20909	1.04966	1.09314	1	0.827475	0.761021	0.792385	1.21056	1.16198	1.14975
aSMA/GAPDH (FC)	1	2.36291	2.3123	2.39985	1.15122	0.904828	0.991593	1	1.06477	0.946145	0.948971	1.00714	0.9758	1.01428

## Sheet: Figure 2
Figure 2. Inhibition of STAT3 in TGFβ1- or IL11-stimulated fibroblasts causes ER stress-related fibroblast dysfunction mimicking effects of generic ER stressors.
Fig. 2C		aSMA+ve cells (%)
BL	rhIL11	rhIL11+DMSO	rhIL11+U0126	rhIL11+S3I-201
11.2416	58.124	54.8077	29.1071	24.0586
16.9014	63.9692	57.2519	25.6863	20.6704
12.5	57.2183	53.1629	31.7848	21.0332
14.4499	63.3094	66.4931	23.3096	25.6471
14.23	60.9907	52.0871	31.3278	22.7451
12.8205	63.1829	62.1701	22.5352	21.8605
12.0253	55.6863	59.4108	26.5347	23.956
12.2951	56.5972	62.4567	21.0744	23.7052
14.2061	56.3636	57.7465	24.8366	20.4748
10.8793	58.0343	55.4472	24.8497	25.2677
14.2857	57.4257	56.4	23.3857	25.0549
15.3846	63.8889	56.962	25	26.1494
12.1739	51.1244	57.5342	22.0755	19.9616
10.2819	58.626	55.2716	23.1084	21.4
Fig. 2D		Collagen I (Intensity/Area)
BL	rhIL11	rhIL11+DMSO	rhIL11+U0126	rhIL11+S3I-201
290.86	758.504	713.375	286.953	222.321
246.044	721.02	726.063	259.812	231.673
282.397	783.1	771.372	275.008	238.089
272.545	764.407	746.779	242.097	234.942
273.6	747.26	696.238	281.551	243.423
223.833	670.098	722.751	265.697	226.238
248.351	694.807	720.928	235.643	212.212
288.502	732.356	736.561	259.402	277.723
268.121	699.907	751.766	272.989	238.161
261.296	722.724	678.318	277.729	250.015
274.8	714.011	718.752	318.397	250.2
277.827	771.335	717.61	275.047	223.392
256.128	704.756	707.146	234.453	267.446
225.82	770.578		230.349	214.029
Fig. 2E	WB quantification		FC: Fold change
	BL	rhIL11	rhIL11+DMSO	rhIL11+U0126	rhIL11+S3I-201
p-ERK/ERK (FC)	1	3.4545	3.36287	0.34945	1.06983
p-STAT3/STAT3 (FC)	1	1.60213	1.81646	1.77892	0.683674
aSMA/GAPDH (FC)	1	2.16256	2.08486	0.937241	0.847333
CHOP/GAPDH (FC)	1	0.937175	0.980864	1.40963	7.96015
Cl. CASP3/CASP3 (FC)	1	0.937175	0.980864	1.40963	7.96015
Fig. 2F	aSMA+ve cells (%)
BL	rhIL11	rhIL11+DMSO	rhIL11+Stattic
11.2416	58.124	54.8077	13.3333
16.9014	63.9692	57.2519	16
12.5	57.2183	53.1629	13.7931
14.4499	63.3094	66.4931	14.5455
14.23	60.9907	52.0871	17.0213
12.8205	63.1829	62.1701	17.6471
12.0253	55.6863	59.4108	16.9492
12.2951	56.5972	62.4567	16
14.2061	56.3636	57.7465	14.1593
10.8793	58.0343	55.4472	14.2857
14.2857	57.4257	56.4	17.1429
15.3846	63.8889	56.962	18.75
12.1739	51.1244	57.5342	20.5128
10.2819	58.626	55.2716	16.6667
Fig. 2G	aSMA+ve cells (%)
BL	rhTGFb1	rhTGFb1+DMSO	rhTGFb1+Stattic
17.5	63.7475	64.0625	22.2222
16.6065	60.2083	61.0092	20.5128
17.6252	56.7073	65.1546	21.519
20.9302	55.7957	57.451	18.3673
17.2414	64.0657	62.7451	21.8182
15.9292	57.7039	60.8374	21.4876
14.7009	65.1805	65.9624	18.75
18.6538	63.1466	56.1485	17.8947
23.1198	55.6373	65.586	27.2727
17.3835	66.2222	63.1356	20.8333
16.6667	58.4362	58.483	25
11.3057	53.8462	56.2607	16.1765
15.3333	63.8444	62.5767	29.9145
18.3303	62.8998	60.4697	21.0526
Fig. 2H	Collagen I (Intensity/Area)
BL	rhIL11	rhIL11+DMSO	rhIL11+Stattic
290.86	758.504	713.375	191.024
246.044	721.02	726.063	165.782
282.397	783.1	771.372	229.034
272.545	764.407	746.779	150.049
273.6	747.26	696.238	223.239
223.833	670.098	722.751	211.648
248.351	694.807	720.928	224.709
288.502	732.356	736.561	220.155
268.121	699.907	751.766	207.475
261.296	722.724	678.318	197.98
274.8	714.011	718.752	216.151
277.827	771.335	717.61	210.188
256.128	704.756	707.146	203.589
225.82	770.578		214.002
Fig. 2I	Collagen I (Intensity/Area)
BL	rhTGFb1	rhTGFb1+DMSO	rhTGFb1+Stattic
270.289	744.542	820.813	186.032
225.727	733.798	793.395	226.473
242.426	781.705	812.189	164.162
258.107	789.055	720.568	211.151
250.717	707.159	774.733	218.902
249.773	787.531	792.087	190.234
199.185	809	786.482	181.528
265.202	819.591	733.332	197.42
267.813	758.282	779.124	213.364
235.894	789.956	744.301	221.386
253.828	788.347	732.302	152.12
251.726	773.115	746.399	179.051
244.995	801.455	746.256	189.166
196.261	753.667	736.429	168.795
Fig. 2J	WB quantification		FC: Fold change
	BL	BL+DMSO	rhIL11	rhIL11+DMSO	rhTGFb1	rhTGFb1+DMSO	BL+S3I-201	S3I-201+rhIL11	S3I-201+TGFb1	BL+Stattic	Stattic+rhIL11	Stattic+TGFb1
p-ERK/ERK (FC)	1	1.0245	3.6991	3.66767	3.25759	3.13891	1.01798	1.31102	1.63765	0.773	0.853433	0.821635
p-STAT3/STAT3 (FC)	1	1.12597	1.77871	1.96493	2.18712	2.17097	0.578003	0.650582	0.72235	0.183791	0.324425	0.317698
aSMA/GAPDH (FC)	1	1.06656	2.40667	2.3931	2.9275	3.15796	1.1217	1.0046	0.988883	0.956617	0.939998	0.922237
BIP/GAPDH (FC)	1	0.958203	2.40922	2.42481	3.61442	3.80038	1.82571	7.81989	12.497	2.25143	15.082	19.7121
XBP1-S/GAPDH (FC)	1	1.07955	2.23978	2.46993	3.361	3.59209	1.41033	4.38422	5.56739	2.0514	6.40767	7.54306
CHOP/GAPDH (FC)	1	1.0033	1.05498	1.02672	1.02607	1.04622	0.986612	7.66408	9.07952	1.04611	10.9198	10.5854
Cl. CASP3/CASP3 (FC)	1	0.965766	1.04758	1.09166	1.06881	1.07459	0.986734	8.46384	8.32734	1.01449	19.3369	16.9356
Fig. 2K	WB quantification		FC: Fold change
	BL	TGFb1	TGFb1+IgG	TGFb1+anti-IL11	TGFb1+anti-IL11RA
BIP/GAPDH (FC)	1	3.26609	3.22186	0.943978	0.999565
XBP1-S/GAPDH (FC)	1	3.26609	3.22186	0.943978	0.999565
Fig. 2L
aSMA+ve cells (%)									Collagen I (Intensity/Area)
BL+DMSO	BL+Tunicamycin	BL+Thapsigargin	TGFb1+DMSO	TGFb1+Tunicamycin	TGFb1+Thapsigargin	rhIL11+DMSO	rhIL11+Tunicamycin	rhIL11+Thapsigargin	BL+DMSO	BL+Tunicamycin	BL+Thapsigargin	TGFb1+DMSO	TGFb1+Tunicamycin	TGFb1+Thapsigargin	rhIL11+DMSO	rhIL11+Tunicamycin	rhIL11+Thapsigargin
23.676	29.9703	20.7547	57.0149	33.25	25.1451	61.4841	33.9623	36.6255	236.029	186.469	178.456	514.548	209.571	192.376	426.854	214.532	193.483
23.5192	23.9544	25.641	63.3898	21.8543	26.6393	58.1475	24.9551	35	234.623	179.699	223.143	443.429	216.352	178.055	424.178	204.272	210.239
25.6591	28.7879	20.268	65.6646	28.595	27.2277	58.3804	23.5786	29.1139	216.06	183.267	173.21	494.075	209.846	198.997	457.047	205.936	232.126
23.3043	26.2019	29.1089	58.0282	27.1186	29.868	59.3103	28.6701	32.6087	205.196	171.747	221.947	495.317	195.552	186.982	437.726	207.241	209.704
23.7269	21.2766	19.2488	50.3989	22.1519	22.3101	50.3726	19.9017	17.2857	231.73	179.704	184.554	410.718	217.944	196.192	464.668	262.068	188.424
22.1294	25.1553	26.1765	50	30.9859	26.6667	59.6535	21.3115	20.7951	256.823	185.548	174.568	435.899	222.919	210.976	424.84	245.285	204.599
25.4448	22.5914	24.0964	56.2696	31.1475	20.0647	56.6845	30.4609	26.8765	225.779	211.547	163.068	474.67	246.166	181.398	412.788	187.839	166.342
25.1046	25.6167	18.8462	56.6197	24.3506	19.7138	57.7211	20.3642	22.3062	237.555	167.78	183.824	475.69	235.276	165.666	503.991	192.215	180.811
26.601	28.4452	19.8444	58.3535	26.7769	23.8516	53.0581	29.6296	23.2662	197.024	182.017	187.941	468.242	211.767	177.747	476.805	215.816	183.04
21.4286	28.0603	25.2747	51.8414	19.7802	18.9069	62.3134	23.4234	23.987	237.1	172.2	150.166	485.72	211.57	208.26	449.268	206.898	193.546
24.7154	29.5265	21.9031	57.7335	32.0334	29.4776	54.5455	25.228	25.3488	244.226	205.603	177.717	503.38	259.295	227.555	441.818	195.247	173.859
26.7699	26.5938	25.4011	63.1415	21.7391	26.7108	58.0479	26.7574	30.303	231.53	170.531	161.394	485.075	230.296	185.7	425.572	243.307	194.58
24.6465	23.5195	25	62.2103	25.6545	19.0217	56.1377	25.5556	21.9008	218.05	181.808	162.88	527.83	226.208	224.397	431.701	215.576	181.344
26.93	30.8901	22.4532	57.3374	34.7727	22.8507	56.5217	31.1275	26.6667	210.579	187.244	148.016	458.711	214.713	184.921	415.715	195.482	161.657
Fig. 2M	WB quantification		FC: Fold change
	BL+DMSO	BL+Tunicamycin	BL+Thapsigargin	TGFb1+DMSO	TGFb1+Tunicamycin	TGFb1+Thapsigargin	rhIL11+DMSO	rhIL11+Tunicamycin	rhIL11+Thapsigargin
p-ERK/ERK (FC)	1	0.835573	0.859593	3.37895	1.04092	1.02835	3.2439	0.916459	0.877956
p-STAT3/STAT3 (FC)	1	0.223158	0.244996	2.55778	0.258694	0.200234	2.38521	0.179918	0.151069
aSMA/GAPDH (FC)	1	0.62823	0.665693	2.85561	0.994064	1.06353	2.53977	1.04735	0.938583
BIP/GAPDH (FC)	1	4.44486	5.65655	3.68192	21.0913	20.4532	2.41938	13.6083	12.3027
XBP1-S/GAPDH (FC)	1	13.0063	9.6917	3.98977	27.9809	29.5053	2.90525	22.1492	19.0782
CHOP/GAPDH (FC)	1	4.28037	4.87321	1.02421	12.825	13.0012	1.00387	9.39876	10.6237
Cl. CASP3/CASP3 (FC)	1	2.0134	2.25029	0.900272	12.5102	11.7456	1.03666	6.03354	5.73845

## Sheet: Figure 3
Figure 3. TGFβ1- and IL11-stimulated protein synthesis is ERK- and mTOR-dependent.
Fig. 3D	OP-PURO (Intensity/Area)
+OPP									-OPP
BL	TGFb1+IgG	TGFb1+DMSO	TGFb1+anti-IL11	TGFb1+anti-IL11RA	TGFb1+CHX	rhIL11	rhIL11+DMSO	rhIL11+CHX	BL	TGFb1+IgG	TGFb1+DMSO	TGFb1+anti-IL11	TGFb1+anti-IL11RA	TGFb1+CHX	rhIL11	rhIL11+DMSO	rhIL11+CHX
282.502	594.449	407.227	355.125	399.932	206	387.419	363.271	204.227	151.214	154.805	155.036	154.362	153.56	156.545	134.683	136.17	167.262
292.292	489.603	495.218	396.944	314.934	202.246	489.463	524.139	199.648	150.901	150.081	151.575	149.14	147.654	151.551	130.11	133.441	169.337
309.107	511.031	512.484	371.608	330.271	196.137	451.521	448.204	206.724	148.682	158.714	148.137	151.545	158.62	148.976	130.484	132.445	155.565
247.138	541.277	501.436	396.339	348.589	193.013	462.137	439.206	183.256	158.385	151.085	155.173	152.631	147.771	154.757	132.211	131.633	139.897
282.434	398.564	458.33	317.839	368.371	184.778	433.971	438.798	200.31	168.811	148.128	280.215	149.2	149.651	136.906	145.454	130.381	140.231
237.236	480.725	571.764	366.057	375.717	199.17	430.011	424.381	188.809	146.705	151.055	150.274	152.186	149.948	152.375	129.657	130.923	140.527
242.139	407.699	489.109	341.891	338.409	189.15	438.387	413.286	177.98	157.174	151.472	148.023	152.724	147.496	147.567	124.859	127.994	139.199
233.525	440.991	466.411	311.953	301.178	187.486	418.546	426.563	206.67	155.612	150.995	154.706	157.302	155.25	153.893	130.917	134.601	136.318
316.958	421.808	492.217	291.971	299.895	193.123	442.863	488.879	193.521	149.692	169.188	146.749	151.514	148.56	148.875	125.646	129.672	137.442
312.846	517.186	515.344	314.746	274.009	187.82	416.192	454.868	209.851	151.159	150.719	148.282	149.756	151.688	149.932	127.542	131.034	134.397
234.423	579.057	496.994	259.676	331.955	188.46	403.331	446.731	200.212	152.597	149.067	175.681	153.575	152.537	148.636	127.203	133.399	133.092
272.753	480.56	545.356	308.229	306.474	192.704	406.613	387.7	197.843	155.422	147.297	149.674	202.364	151.089	147.964	127.269	132.679	135.24
301.861	536.749	557.923	306.079	355.745	180.995	445.376	363.693	196.458	152.933	147.339	146.779	149.524	150.577	152.846	128.708	130.839	133.687
302.582	443.196	468.826	323.402	361.7	197.12	454.071	497.28	206.073	205.427	146.383	148.338	150.619	146.547	146.208	125.368	127.776	134.237
246.562	423.468	470.657	324.508	285.973	196.846	495.193	448.657	193.67	163.729	150.885	156.822	157.107	153.232	155.266	138.463	156.057	144.445
269.764	454.962	394.765	332.724	327.385	185.514	439.008	374.817	205.762	150.844	153.237	146.285	149.255	146.138	148.544	128.125	133.79	133.754
267.899	470.171	511.646	274.861	323.723	192.963	420.503	448.745	204.801	174.323	145.07	150.571	150.213	148.679	148.369	132.493	154.638	138.896
247.577	466.974	491.893	266.543	269.191	192.445	466.11	369.289	223.12	147.938	145.94	149.443	149.46	150.343	151.75	135.196	137.725	136.38
253.389	484.861	478.655	340.25	254.01	190.421	341.313	463.219	200.397	150.628	145.281	149.761	150.685	151.995	148.836	141.009	137.217	138.36
250.979	458.526	472.795	268.991	315.824	189.192	462.679	359.378	186.4	152.777	143.833	150.393	151.97	150.761	149.702	135.359	137.476	150.971
258.346		560.744	314.611	254.67	180.97	337.137	402.195		147.349	144.203	185.446	148.271	175.482	147.186	134.171	163.849	135.488
196.084									136.854
201.48									145.082
198.492									132.583
248.118									138.963
258.384									143.245
239.975									133.882
327.57									131.833
290.06									176.887
237.221									179.03
235.378									177.476
245.098									177.116
301.946									179.404
304.504									178.301
308.152									181.716
303.706									136.44
247.268									130.059
321.033									132.141
324.136									132.141
281.818									132.987
246.027									145.786
315.189									133.293
Fig. 3E	WB quantification		FC: Fold change
		TGFb1
	BL	15 min	2 h	4 h	6 h	24 h
p-p70S6K/p70S6K (FC)	1	1.59	2.2615	1.56355	3.60412	3.72195
p-S6RP/S6RP (FC)	1	5.56707	6.57559	4.64993	7.79648	9.77791
Fig. 3F	WB quantification		FC: Fold change
		rhIL11
	BL	15 min	2 h	4 h	6 h	24 h
p-p70S6K/p70S6K (FC)	1	1.13123	2.5968	2.32348	3.8569	4.26842
p-S6RP/S6RP (FC)	1	2.1184	4.30886	4.87386	8.10601	8.81498
Fig. 3G	WB quantification		FC: Fold change
	BL	rhTGFb1	rhTGFb1+IgG	rhTGFb1+anti-IL11	rhTGFb1+anti-IL11RA
p-p70S6K/p70S6K (FC)	1	3.43016	3.67539	0.950573	1.01217
p-S6RP/S6RP (FC)	1	9.07174	8.96498	1.2837	1.14672
Fig. 3H	WB quantification		FC: Fold change
	BL	BL+DMSO	rhIL11	rhIL11+DMSO	TGFb1	TGFb1+DMSO	U0126	U0126+rhIL11	U0126+TGFb1
p-ERK/ERK (FC)	1	0.984673	4.04154	3.64155	3.62618	3.5007	0.253461	0.324799	0.314498
p-p70S6K/p70S6K (FC)	1	1.02482	4.37155	4.66639	4.49323	4.29211	1.0094	1.13584	1.40422
p-S6RP/S6RP (FC)	1	1.00188	8.83	9.14993	10.4673	10.6653	1.04927	1.73067	2.17464
Fig. 3I	WB quantification		FC: Fold change
	BL+DMSO	rhIL11+DMSO	rhIL11+Rapamycin	rhIL11+Wortmannin	rhIL11+U1026
p-ERK/ERK (FC)	1	3.47726	1.61816	2.84799	0.329389
p-mTOR/mTOR (FC)	1	4.44588	0.363036	3.61497	2.19845
p-p70S6K/p70S6K (FC)	1	4.95859	1.05139	3.83808	1.17883
p-S6RP/S6RP (FC)	1	9.40992	0.50395	8.00056	1.66691

## Sheet: Figure 4
Figure 4. IL11 promotes the translation of proline-rich pro-fibrotic genes, including itself, through EPRS activity.
Fig. 4B	IL11 ELISA (pg/ml)
BL	TGFb1+DMSO	TGFb1+Halo	TGFb1+CHX	HyperIL11+DMSO	HyperIL11+Halo	HyperIL11+CHX
17.35	259.7	105.8	11	98	49.65	16.2
15	261.7	101.15	11.85	109.7	52.45	18.4
15.75	277.9	103.9	9.85	117.15	52.35	16.05
17.75	267.9	109.8	12.15	112.6	53.5	15.6
Fig. 4C	Collagen I (Intensity/Area)
BL	TGFb1+DMSO	TGFb1+Halo	HyperIL11+DMSO	HyperIL11+Halo
136.38	346.777	124.247	558.62	245.721
119.06	336.041	142.228	433.092	195.321
124.427	409.318	145.722	568.849	249.641
133.7	328.428	131.244	562.209	240.649
126.237	374.056	142.112	550.521	210.432
109.123	340.753	150.113	591.491	262.369
116.001	336.052	145.668	479.56	234.284
107.229	412.092	151.071	596.032	299.794
141.894	362.182	139.365	455.483	215.524
121.616	333.46	126.989	520.945	262.033
138.428	417.958	152.475	565.457	301.903
144.543	322.944	137.748	530.537	270.237
123.822	324.89	149.43	546.106	278.143
119.171	375.526	133.634	463.26	247.902
110.839	400.276	151.623	575.098	255.89
135.7	405.471	142.422	426.105	296.613
124.043	390.786	151.857	546.632	280.837
109.285	416.429	145.231	595.022	272.671
117.481	335.713	146.224	505.596	246.669
115.842	384.119	153.683	596.871	265.358
125.997	374.766	146.952	465.455	250.983
137.298
153.125
224.432
204.837
191.061
188.749
194.959
179.966
197.234
239.95
228.447
165.532
178.105
190.698
161.695
192.88
190.01
256.441
208.76
254.786
227.033
251.438
227.863
237.703
235.943
257.257
255.767
228.692
254.677
215.702
247.068
247.312
235.841
234.937
239.331
Fig. 4E	Relative RNA expression (Fold Change)
siNT	siEPRS
0.91352	0.11819
0.95532	0.113237
1.14586	0.0778081
Fig. 4F	WB quantification		FC: Fold change
	siNT		siEPRS
EPRS/GAPDH (FC)	1.05298	0.947022	0.208652	0.184918
Fig. 4G
BL+siNT	TGFb1+siNT	TGFb1+siEPRS	HyperIL11+siNT	HyperIL11+siEPRS
30.7	1354.8	548.7	410.15	92.2
48.75	1412.85	554.75	438.85	91.2
30.1	1205.5	636.3	450.6	103.55
42.3	1267.25	656.4	435.3	106.4
Fig. 4H	Collagen I (Intensity/Area)
BL+siNT	BL+siEPRS	TGFb1+siNT	TGFb1+siEPRS	rhIL11+siNT	rhIL11+siEPRS
182.469	178.465	422.192	198.462	430.815	196.397
146.456	146.743	434.727	253.364	464.073	173.777
144.727	171.495	492.747	197.432	415.761	157.96
174.266	153.928	497.874	198.389	436.265	188.104
151.798	141.342	512.211	236.841	458.979	153.506
158.655	149.29	457.928	174.977	421.182	236.582
137.92	185.059	430.594	177.426	448.811	245.763
178.517	191.18	451.649	168.185	454.274	269.189
158.228	158.043	404.935	169.452	482.833	180.539
150.645	159.747	404.673	201.566	435.988	248.335
163.696	146.977	478.678	255.192	411.619	200.889
153.951	152.655	429.601	175.598	454.701	169.467
144.262	178.767	439.227	261.443	415.015	247.209
143.867	151.619	404.148	242.422	492.155	180.847

## Sheet: Figure 5
Figure 5. Nintedanib, Pirfenidone and anti-IL11 have different anti-fibrotic mechanisms of action in cardiac fibroblasts
Fig. 5A	WB quantification		FC: Fold change
	BL+DMSO	TGFb1+DMSO	TGFb1+Nintedanib	TGFb1+Pirfenidone	TGFb1+IgG	TGFb1+anti-IL11	TGFb1+anti-IL11+Nintedanib	TGFb1+U1026	TGFb1+S3I-201
p-ERK/ERK (FC)	1	3.10296	0.737499	1.36251	3.45526	0.966719	0.679075	0.288801	1.74677
p-STAT3/STAT3 (FC)	1	2.84286	0.60204	2.03164	3.01788	2.83528	0.627263	2.61353	0.636717
p-mTOR/mTOR (FC)	1	4.03024	1.45379	1.85294	4.31157	1.62674	1.05776	0.9589	1.29933
p-p70S6K/p70S6K (FC)	1	4.47421	1.05191	2.97009	4.49407	1.05509	0.821077	1.28788	3.30116
p-S6RP/S6RP (FC)	1	10.8378	1.10554	6.14706	10.2978	1.00754	0.970446	1.87461	4.94235
aSMA/GAPDH (FC)	1	2.84286	0.60204	2.03164	3.01788	2.83528	0.627263	2.61353	0.636717
BIP/GAPDH (FC)	1	4.46855	18.5464	4.39858	4.56	1.11452	7.15261	1.18163	20.8488
XBP1-S/GAPDH (FC)	1	3.59543	6.38133	3.81253	3.41012	1.52142	3.45294	1.288	5.85832
CHOP/GAPDH (FC)	1	1.01132	10.6584	0.967793	1.02141	1.09899	3.5606	1.02795	12.1416
Cl. CASP3/CASP3 (FC)	1	1.05543	10.5191	0.994331	1.00934	0.898767	3.6663	1.11623	9.6655
Fig. 5B	WB quantification		FC: Fold change
	BL+DMSO	TGFb1+DMSO	BL+Nintedanib (2)	BL+Nintedanib (8)	BL+Nintedanib (16)	TGFb1+Nintedanib (0.0078)	TGFb1+Nintedanib (0.031)	TGFb1+Nintedanib (0.125)	TGFb1+Nintedanib (0.5)	TGFb1+Nintedanib (2)	TGFb1+Nintedanib (8)	TGFb1+Nintedanib (16)
p-ERK/ERK (FC)	1	3.50784	0.748235	0.685015	0.669347	3.99631	3.71165	3.38996	2.06489	0.650538	0.613058	0.711973
p-STAT3/STAT3 (FC)	1	2.40836	0.429086	0.283094	0.191733	2.55692	1.94719	1.16182	0.856433	0.535735	0.335698	0.17958
aSMA/GAPDH (FC)	1	4.41126	0.959735	1.01857	1.09586	4.15219	4.30372	3.35786	2.57878	1.3388	0.945588	1.00879
BIP/GAPDH (FC)	1	4.55335	1.0735	1.34022	1.26361	4.70148	9.2637	12.5891	16.7356	22.1509	26.457	28.8815
CHOP/GAPDH (FC)	1	0.988465	1.08501	0.950289	1.09718	1.07397	1.8967	3.66421	6.62317	12.6499	23.3054	29.0058
Cl. CASP3/CASP3 (FC)	1	0.991338	0.950092	1.02174	1.05889	1.17095	1.13552	0.987393	3.05609	11.6301	14.7312	15.9262
Fig. 5C	WB quantification		FC: Fold change
	BL+DMSO	PDGF	PDGF+Nintedanib	PDGF+Pirfenidone	PDGF+IgG	PDGF+anti-IL11	PDGF+anti-IL11+Nintedanib	PDGF+U1026	PDGF+S3I-201
p-ERK/ERK (FC)	1	4.33294	4.03782	0.982668	2.58098	4.32894	1.13749	1.05659	0.353694	2.01681
p-STAT3/STAT3 (FC)	1	1.88417	1.77004	0.542453	1.64519	1.90629	1.78879	0.473123	1.53822	0.424666
aSMA/GAPDH (FC)	1	2.49839	2.61222	1.17944	1.42094	2.46747	1.25544	0.961451	0.956008	1.14938
BIP/GAPDH (FC)	1	2.70216	2.86141	15.8869	3.16706	2.95818	1.07019	6.07133	2.36992	17.0912
XBP1-S/GAPDH (FC)	1	2.68528	2.94266	7.86947	2.43949	2.50942	1.0933	3.55404	1.75395	8.30616
CHOP/GAPDH (FC)	1	1.04112	1.00244	8.14834	1.00038	1.00331	1.06671	2.72059	1.15803	8.81492
Cl. CASP3/CASP3 (FC)	1	1.12079	0.981678	11.2127	1.07322	1.0003	0.959385	2.82917	1.14354	12.5743
Fig. 5D	WB quantification		FC: Fold change
	BL+DMSO	PDGF+DMSO	PDGF+Nintedanib (0.0078)	PDGF+Nintedanib (0.031)	PDGF+Nintedanib (0.125)	PDGF+Nintedanib (0.5)	PDGF+Nintedanib (2)	PDGF+Nintedanib (8)
p-PDGFRB/PDGFRB (FC)	1	2.07906	2.04513	1.79167	1.33965	0.879049	0.569838	0.425123
p-ERK/ERK (FC)	1	3.89691	4.12355	4.01017	3.31452	1.84641	1.18273	0.961077
p-STAT3/STAT3 (FC)	1	2.12842	2.35879	1.67095	1.00613	0.637526	0.435926	0.358158
aSMA/GAPDH (FC)	1	3.38557	3.08795	2.95999	2.37993	1.77805	1.24527	1.07754
BIP/GAPDH (FC)	1	2.33187	2.2574	2.65523	5.91129	11.0362	15.9085	18.3483
CHOP/GAPDH (FC)	1	1.12839	1.05881	1.0303	1.07961	4.74274	8.63272	10.2899
Cl. CASP3/CASP3 (FC)	1	0.997602	1.05408	0.917725	1.10865	2.95005	11.8431	13.9048
Fig. 5E	WB quantification		FC: Fold change
	aSMA/GAPDH (FC)			BIP/GAPDH (FC)
TGFb1+Nintedanib (0.0078)	4.00126	4.11055	3.16935	4.84237	3.59598	5.22857
TGFb1+Nintedanib (0.031)	3.99667	3.63839	3.47013	10.7912	5.17291	8.50358
TGFb1+Nintedanib (0.125)	3.13296	2.99017	3.10123	12.3412	13.0034	14.8123
TGFb1+Nintedanib (0.5)	2.44986	1.92044	2.34156	17.4492	16.1994	21.2826
TGFb1+Nintedanib (2)	1.28307	1.03158	1.22375	23.2657	23.2015	25.0661
TGFb1+Nintedanib (8)	0.995238	1.08145	1.00603	26.6933	27.0767	27.3666
TGFb1+Nintedanib (16)	0.954622	0.908438	0.87568	27.8108	28.9672	28.7251

## Sheet: Figure S1
Figure S1. TGFβ1 stimulates myofibroblast transformation in an IL11- and ERK-dependent manner.
Fig. S1A	WB quantification		FC: Fold change
	BL	15 min	2 h	4 h	6 h	24 h
p-SMAD2/SMAD2 (FC)	1	15.9337	13.6849	14.5051	11.9199	6.68891
Fig. S1B	IL11 ELISA (pg/ml)
BL	15 min	2 h	4 h	6 h	24 h
9.87097	7.6129	26.9677	70.1936	144.323	576.323
11.0968	8.7742	31.3548	54.6452	150.71	585.71
8.90323	10.0645	44.9032	61.4194	168.71	588.484
10.3871	10.7742	20.4516	50.7097	151.032	506.323
Fig. S1C	Collagen I (Intensity/Area)
Baseline	rhTGFβ1	rhTGFβ1+IgG	rhTGFβ1+X203	rhTGFβ1+X209
223.413	473.635	511.949	328.568	256.044
187.8	477.247	505.373	321.195	339.288
182.691	400.411	510.013	273.766	239.22
186.527	412.279	465.774	281.437	288.061
232.922	491	484.778	306.38	339.046
230.942	473.549	470.213	312.207	318.017
209.938	441.412	493.35	272.816	334.149
234.555	467.509	473.201	265.201	287.788
174.787	412.998	446.825	294.963	298.651
181.014	523.286	415.835	342.803	310.918
194.135	509.525	473.346	300.878	280.88
203.249	494.11	488.889	330.218	295.979
228.963	443.576	444.655	298.552	305.141
192.516	496.321	470.107	255.246	263.303
Fig. S1D	aSMA+ve cells (%)
Baseline	rhTGFβ1	rhTGFβ1+IgG	rhTGFβ1+X203	rhTGFβ1+X209
12.5341	67.3077	64.7727	36.2745	37.7841
18.677	68.7845	62.0112	39.9457	35.7724
19.6375	63.8418	67.979	39.4737	31.8486
19.305	58.9583	64.2612	40.9207	36.6906
11.5063	60.2381	70.1799	36.6995	29.5031
16.75	63.9456	65.8537	40.8451	32.9341
17.2662	59.7444	60.0515	32.3877	24.5283
14.8893	62.766	63.4715	26.2774	33.4842
20.1149	65.7005	61.4973	29.5393	31.25
21.6393	66.6667	65.7267	35.2201	40.5797
14.5946	62.5	67.0103	34.3949	39.782
23.0435	68.9655	65.5949	39.9306	41.2281
19.8091	64.2857	67.5958	27.1676	40.0673
16.6259	67.4772	69.967	32.622	44.7059
Fig. S1F
Antibody concentration (nM)	IgG (11E10)		MAB628
4000	1.47	0	100	96.75
1000	0	2.09	97.04	94.83
250	0	2.93	70.27	67.12
62.5	2.78	6.37	51.81	52.72
15.625	0.1	3.61	27.62	21.53
3.9	6.41	0.71	14.78	10.22
0.976	2.56	5.86	10.76	8.73
0.244	4.38	0	7.17	0
0.0061	4.63	2.6	0.68	0.13
Fig. S1G	WB quantification		FC: Fold change
	BL	rhIL11	rhIL11+IgG	rhIL11+anti-IL11	rhIL11+MAB218
p-ERK/ERK (FC)	1	3.32163	3.16201	1.12927	1.08906
Fig. S1H	WB quantification		FC: Fold change
	BL	rhIL11	rhIL11+IgG	rhIL11+anti-IL11	rhIL11+MAB218
p-STAT3/STAT3 (FC)	1	3.67529	3.54624	1.21561	2.86755
Fig. S1J	aSMA+ve cells (%)
Baseline	rhIL11	rhIL11+IgG	rhIl11+anti-IL11	rhIL11+anti-IL11RA	rhIL11+anti-gp130
16.1905	60.3448	59.434	24.2188	29.1545	34.9693
16.095	49.866	58.2418	18.9003	32.7327	34.2756
16.5698	62.7119	57.4144	22.3333	26.3323	24.6964
10.6918	62.8399	58.7662	20.7407	28.6089	33.125
11.1498	60.6061	59.2593	21.0191	24.4147	25.7812
16.5877	55.3459	49.0909	23.1111	24.3243	28.2609
10.9859	51.7143	57.9268	22.2857	27.5862	24.8387
13.0178	55.7471	54.0984	14.9254	24.282	25.9947
14.7799	55.6054	58.0882	17.3585	28.2828	27.027
15.2113	54.9645	59.5469	21.5297	31.1953	25.3086
14.377	55.7093	55.2542	24.4514	34.0909	26.5176
19.4079	61.6379	52.766	18.2724	27.3713	24.5552
14.5503	58.642	54.4236	20.2417	30.4487	29.0909
16.7763	61.1399	63.8587	29.5129	32.337	34.8571
Fig. S1J	Collagen I (Intensity/Area)
Baseline	rhIL11	rhIL11+IgG	rhIl11+anti-IL11	rhIL11+anti-IL11RA	rhIL11+anti-gp130
450.621	635.237	618.372	374.657	412.306	418.113
412.327	545.521	599.014	352.258	469.283	347.648
486.381	566.25	572.046	426.803	377.769	362.829
406.97	499.12	546.376	365.461	378.899	438.097
424.142	482.969	595.86	362.329	361.58	408.538
452.064	554.829	476.984	315.703	360.94	380.441
400.151	586.588	535.126	368.134	341.229	390.315
497.844	560.475	531.937	417.903	378.531	424.175
427.435	463.838	600.573	347.687	343.059	408.494
411.475	468.737	570.265	333.599	370.879	403.31
449.331	459.898	567.314	371.905	362.587	357.826
436.377	520.188	549.151	446.719	407.361	409.168
441.856	501.468	464.212	357.479	330.946	385.803
452.944	567.356	558.125	374.721	372.948	377.454

## Sheet: Figure S2
Figure S2. STAT3 inhibition causes ER stress-related fibroblast dysfunction and cell death.
Fig. S2A	WB quantification		FC: Fold change
	BL	IL11	IL11+DMSO	IL11+U0126	IL11+Stattic (0.156)	IL11+Stattic (0.31)	IL11+Stattic (0.625)	IL11+Stattic (1.25)	IL11+Stattic (2.5)	IL11+Stattic (5)	IL11+Stattic (10)	IL11+Stattic (20)
p-STAT3/STAT3 (FC)	1	4.02811	4.1328	3.84999	3.33723	3.53037	2.87276	2.0165	1.35805	0.980416	0.729682	0.75718
Fig. S2C
BL	IL11	IL11+DMSO	IL11+U0126	IL11+S3I-201	IL11+Stattic
0.0881316	0.091954	0.0434342	0.305927	0.158028	45.4378
0.205705	0.0858984	0.128848	0.266768	0.132297	50.2233
0.103245	0.0443721	0.0935454	0.276899	0.185435	50.5334
Fig. S2D	WB quantification		FC: Fold change
	TGFb1 (15 min)
	DMSO	S3I-201	Stattic	IgG	anti-IL11	anti-IL11RA
CHOP/GAPDH (FC)	1	10.367	12.0841	1.00255	0.964498	1.02262
Cl. CASP3/CASP3 (FC)	1	7.82193	19.917	1.09692	0.952598	0.998739
Fig. S2E	aSMA+ve cells (%)
BL+DMSO	BL+Tunicamycin	BL+Thapsigargin	TGFβ1+DMSO	TGFβ1+Tunicamycin	TGFβ1+Thapsigargin	IL11+DMSO	IL11+Tunicamycin	IL11+Thapsigargin
23.676	29.9703	20.7547	57.0149	33.25	25.1451	61.4841	33.9623	36.6255
23.5192	23.9544	25.641	63.3898	21.8543	26.6393	58.1475	24.9551	35
25.6591	28.7879	20.268	65.6646	28.595	27.2277	58.3804	23.5786	29.1139
23.3043	26.2019	29.1089	58.0282	27.1186	29.868	59.3103	28.6701	32.6087
23.7269	21.2766	19.2488	50.3989	22.1519	22.3101	50.3726	19.9017	17.2857
22.1294	25.1553	26.1765	50	30.9859	26.6667	59.6535	21.3115	20.7951
25.4448	22.5914	24.0964	56.2696	31.1475	20.0647	56.6845	30.4609	26.8765
25.1046	25.6167	18.8462	56.6197	24.3506	19.7138	57.7211	20.3642	22.3062
26.601	28.4452	19.8444	58.3535	26.7769	23.8516	53.0581	29.6296	23.2662
21.4286	28.0603	25.2747	51.8414	19.7802	18.9069	62.3134	23.4234	23.987
24.7154	29.5265	21.9031	57.7335	32.0334	29.4776	54.5455	25.228	25.3488
26.7699	26.5938	25.4011	63.1415	21.7391	26.7108	58.0479	26.7574	30.303
24.6465	23.5195	25	62.2103	25.6545	19.0217	56.1377	25.5556	21.9008
26.93	30.8901	22.4532	57.3374	34.7727	22.8507	56.5217	31.1275	26.6667
Fig. S2F	Collagen I (Intensity/Area)
BL+DMSO	BL+Tunicamycin	BL+Thapsigargin	TGFβ1+DMSO	TGFβ1+Tunicamycin	TGFβ1+Thapsigargin	IL11+DMSO	IL11+Tunicamycin	IL11+Thapsigargin
236.029	186.469	178.456	514.548	209.571	192.376	426.854	214.532	193.483
234.623	179.699	223.143	443.429	216.352	178.055	424.178	204.272	210.239
216.06	183.267	173.21	494.075	209.846	198.997	457.047	205.936	232.126
205.196	171.747	221.947	495.317	195.552	186.982	437.726	207.241	209.704
231.73	179.704	184.554	410.718	217.944	196.192	464.668	262.068	188.424
256.823	185.548	174.568	435.899	222.919	210.976	424.84	245.285	204.599
225.779	211.547	163.068	474.67	246.166	181.398	412.788	187.839	166.342
237.555	167.78	183.824	475.69	235.276	165.666	503.991	192.215	180.811
197.024	182.017	187.941	468.242	211.767	177.747	476.805	215.816	183.04
237.1	172.2	150.166	485.72	211.57	208.26	449.268	206.898	193.546
244.226	205.603	177.717	503.38	259.295	227.555	441.818	195.247	173.859
231.53	170.531	161.394	485.075	230.296	185.7	425.572	243.307	194.58
218.05	181.808	162.88	527.83	226.208	224.397	431.701	215.576	181.344
210.579	187.244	148.016	458.711	214.713	184.921	415.715	195.482	161.657
Fig. S2G	WB quantification		FC: Fold change
		TGFβ1						IL11
	BL+DMSO	DMSO	Tunicamycin	Thapsigargin	U0126	S3I-201	Stattic	DMSO	Tunicamycin	Thapsigargin	U0126	S3I-201	Stattic
p-ERK/ERK (FC)	1	3.38144	1.04431	0.98553	0.265174	1.7375	0.838372	3.53429	0.937077	0.862347	0.315864	1.30075	0.866694
p-STAT3/STAT3 (FC)	1	2.61434	0.223561	0.246093	2.46381	0.61459	0.271273	2.2706	0.182526	0.145012	2.41676	0.624053	0.278096
aSMA/GAPDH (FC)	1	3.07827	1.19057	1.15605	1.1419	1.31147	1.12855	2.80332	1.12688	1.10696	1.06909	1.26218	0.893827
BIP/GAPDH (FC)	1	3.24718	24.4669	22.0656	1.18623	19.8612	24.1003	2.61302	24.4813	22.2641	1.05482	12.2309	20.7759
CHOP/GAPDH (FC)	1	1.11963	14.1396	14.4857	0.978395	10.3986	12.5798	0.950399	12.3402	11.7159	1.28281	7.82925	10.0772
Cl. CASP3/CASP3 (FC)	1	0.987956	20.2987	19.7755	1.01776	9.66558	21.7692	1.08056	16.6263	18.7396	1.11434	5.33518	17.9497

## Sheet: Figure S3
Figure S3. Amino acid sequence of mouse IL11.

## Sheet: Figure S4
Figure S4. Nintedanib, Pirfenidone and anti-IL11 have different anti-fibrotic mechanisms of action in lung fibroblasts.
Fig. 5A	WB quantification		FC: Fold change
	BL	BL+DMSO	TGFb1	TGFb1+DMSO	TGFb1+Nintedanib	TGFb1+Pirfenidone	TGFb1+IgG	TGFb1+anti-IL11	TGFb1+anti-IL11+Nintedanib	TGFb1+U1026	TGFb1+S3I-201
p-ERK/ERK (FC)	1	1.08283	6.10771	5.7389	1.05637	3.36149	6.06883	1.19379	0.996072	0.779646	2.03675
p-STAT3/STAT3 (FC)	1	0.956637	1.94558	1.83551	0.492925	0.970652	1.86478	1.83957	0.486178	1.90561	0.539034
p-mTOR/mTOR (FC)	1	1.15449	5.16669	4.72737	1.0503	2.48409	4.71231	0.989129	0.851457	0.883363	2.1598
p-p70S6K/p70S6K (FC)	1	1.05675	5.0774	4.95693	1.48226	2.91639	5.34785	1.43635	1.03443	0.95642	2.84534
p-S6RP/S6RP (FC)	1	1.01083	10.5247	10.1934	0.971776	5.40699	10.7879	1.02643	0.966493	1.78143	5.88054
aSMA/GAPDH (FC)	1	1.02066	3.28372	3.60323	1.45952	1.52062	3.37661	1.24029	0.956847	1.29512	1.16191
BIP/GAPDH (FC)	1	1.05568	3.48895	3.57083	7.15973	2.69553	3.68035	1.20732	3.91651	1.45057	6.87298
XBP1-S/GAPDH (FC)	1	0.966589	3.02725	3.6772	8.19124	4.28504	4.58301	1.64374	4.44917	1.52063	6.56396
CHOP/GAPDH (FC)	1	1.0403	1.02408	0.970577	9.33567	0.964569	1.00157	1.02051	2.31369	1.29101	9.52579
Cl. CASP3/CASP3 (FC)	1	1.0623	0.965309	1.06636	7.02154	1.20906	1.06339	1.04308	2.04073	1.21381	5.03447
